# Supplementary material for: In vitro antimicrobial and in vivo wound healing effect of actinobacterially synthesised nanoparticles of silver, gold and their alloy
Source: Royal Society of Chemistry journal article supplement (doi:10.1039/c7ra08483h), 2017-01-01
Supplement: c7ra08483h1.pdf [file c7ra08483h1.pdf]

## Supplementary materials

### *In vitro* antimicrobial and *in vivo* wound healing effect of actinobacterially synthesised silver, gold and their alloy nanoparticles

**S-Table 1. Minimum inhibitory concentrations (MIC) and Minimum bactericidal concentrations (MBC) of synthesised nanoparticles**

| S. No | Test Pathogens                            | MIC values ( $\mu\text{g/mL}$ ) |       |          | MBC values $\mu\text{g/mL}$ |       |          |
|-------|-------------------------------------------|---------------------------------|-------|----------|-----------------------------|-------|----------|
|       |                                           | AgNPs                           | AuNPs | Ag/AuNPs | AgNPs                       | AuNPs | Ag/AuNPs |
| 1     | <i>Staphylococcus aureus</i> (NCIM 2079)  | 50                              | 25    | 50       | 50                          | 25    | 50       |
| 2     | <i>Escherichia coli</i> (NCIM 2256)       | 6.25                            | 25    | 6.25     | 12.5                        | 25    | 12.5     |
| 3     | <i>Pseudomonas aeruginosa</i> (NCIM 5031) | 6.25                            | 6.25  | 6.25     | 12.5                        | 12.5  | 12.5     |
| 4     | <i>Klebsiella pneumoniae</i> (NCIM 2706)  | 25                              | 12.5  | 25       | 50                          | 25    | 25       |
| 5     | <i>Serratia marcescens</i> (NCIM 5246)    | 12.5                            | 12.5  | 50       | 25                          | 50    | 50       |
| 6     | <i>Candida albicans</i>                   | 6.25                            | 12.5  | 6.25     | -                           | -     | -        |
| 7     | <i>Candida glabrata</i>                   | 12.5                            | 25    | 25       | -                           | -     | -        |

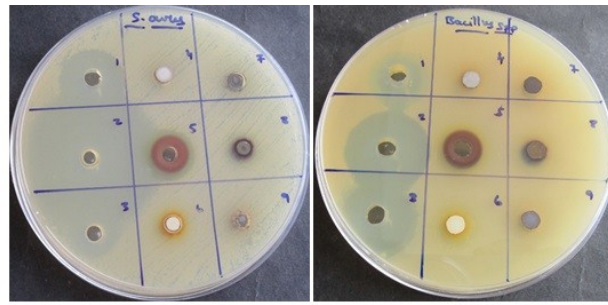

**Staph. aureus**

**Bacillus subtilis**

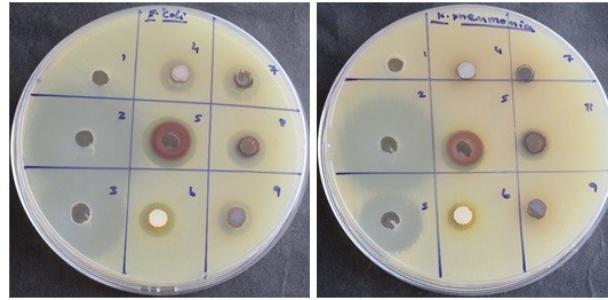

**Escherichia coli**

**Klebsiella pneumoniae**

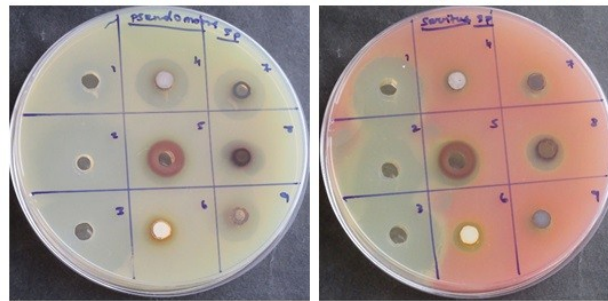

**Pseudomonas aeruginosa**

**Serratia marcescens**

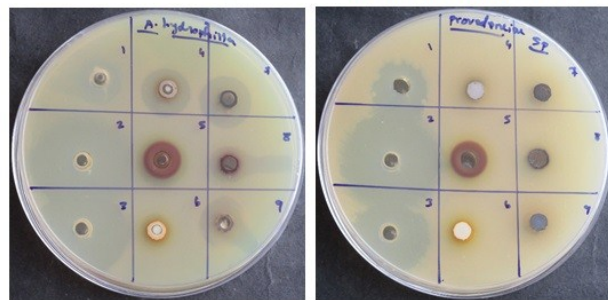

**Aeromonas hydrophila**

**Providencia vermicola**

1 : AgNO<sub>3</sub>; 2 : HAuCl<sub>4</sub>; 3 : AgNO<sub>3</sub> + HAuCl<sub>4</sub>; 4 : STD AgNPs; 5 : STD AuNPs; 6 : STD Ag/AuNPs; 7 : AgNPs; 8 : AuNPs; 9 : Ag/Au-NPs

**S-Figure 1. Antibacterial activity of synthesised and standard nanoparticles**

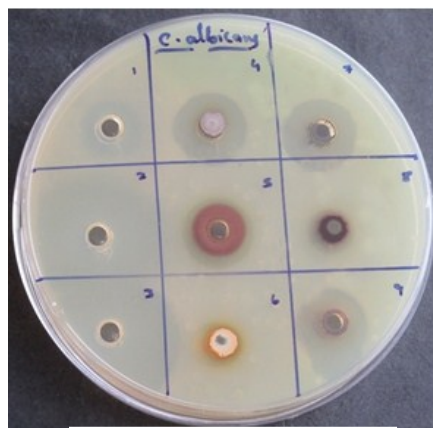

***Candida albicans***

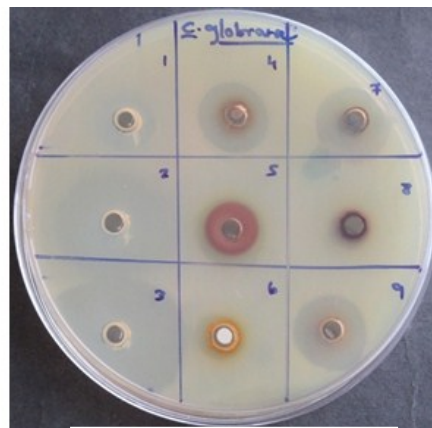

***Candida glabrata***

1 : AgNO<sub>3</sub>; 2 : HAuCl<sub>4</sub>; 3 : AgNO<sub>3</sub> + HAuCl<sub>4</sub>; 4 : STD AgNPs; 5 : STD AuNPs; 6 : STD Ag/AuNPs; 7 : AgNPs; 8 : AuNPs; 9 : Ag/Au-NPs

**S-Figure 2. Antifungal activity of synthesised and standard nanoparticles**

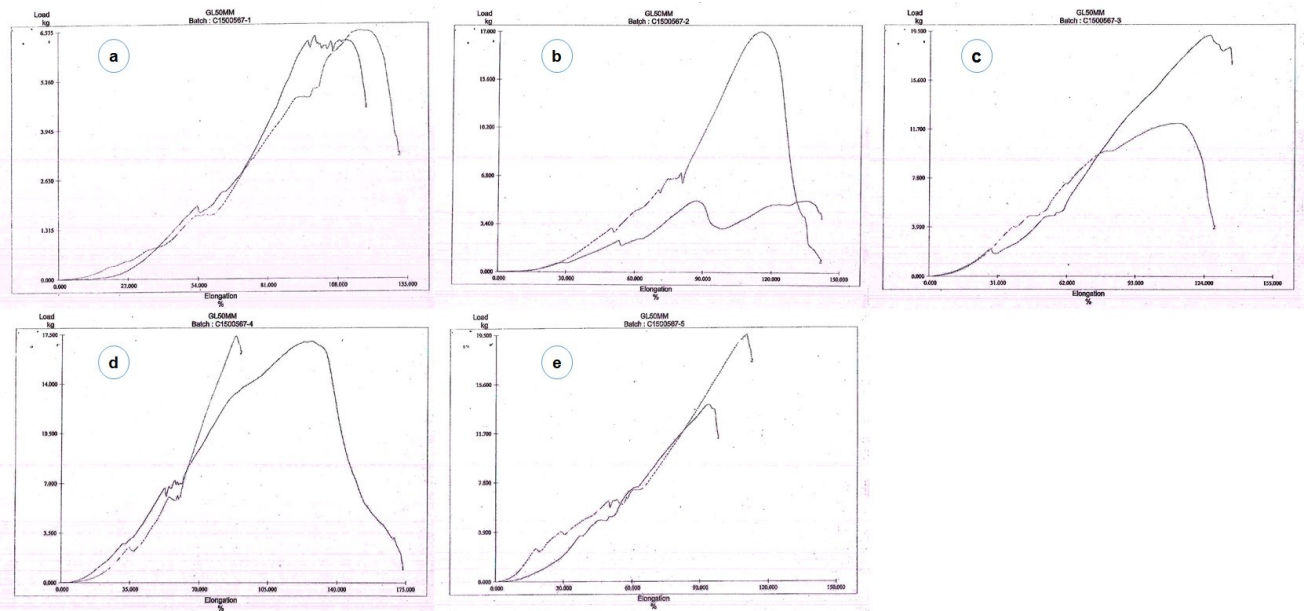

**S-Figure 3. Mechanical wound strength testing of nanoparticles treated rat skin samples.** a : Control animals (Group I); b : Animals treated with standard ointment (Group II); c : Animals treated with AgNPs (Group III); d : Animals treated with AuNPs (Group IV); e : Animals treated with Ag/AuNPs (Group V)
